# Supplementary material for: Enhanced stability of Ge-doped CsPb(I 1− x Br x ) 3 perovskite solar cells
Source: Royal Society of Chemistry journal article supplement (doi:10.1039/d4ta08572h), 2025-01-01
Supplement: d4ta08572h1.pdf [file d4ta08572h1.pdf]

## Supporting Information

### Enhanced Stability of Ge-Doped CsPb(I<sub>1-x</sub>Br<sub>x</sub>)<sub>3</sub> Perovskite Solar Cells

Ruiping Chen<sup>a,c</sup>, Yan Wang<sup>a,b,d\*</sup>, Saqib Nawaz Khan<sup>a,b</sup>, FeiFei Xing<sup>a</sup>, Simiao Li<sup>a</sup>, Yiheng Rao<sup>c,e</sup>, Hao Wang<sup>c,e</sup>, and Zengxia Mei<sup>a,b\*</sup>

<sup>a</sup> Songshan Lake Materials Laboratory, Dongguan, Guangdong 523808, China

<sup>b</sup> Institute of Physics, Chinese Academy of Sciences, Beijing 100190, China

<sup>c</sup> Hubei University, Wuhan 430062, China

<sup>d</sup> Beijing Huairou Laboratory, Beijing 101499, China.

<sup>e</sup> Hubei Yangtze Memory Laboratories, Wuhan 430205, China

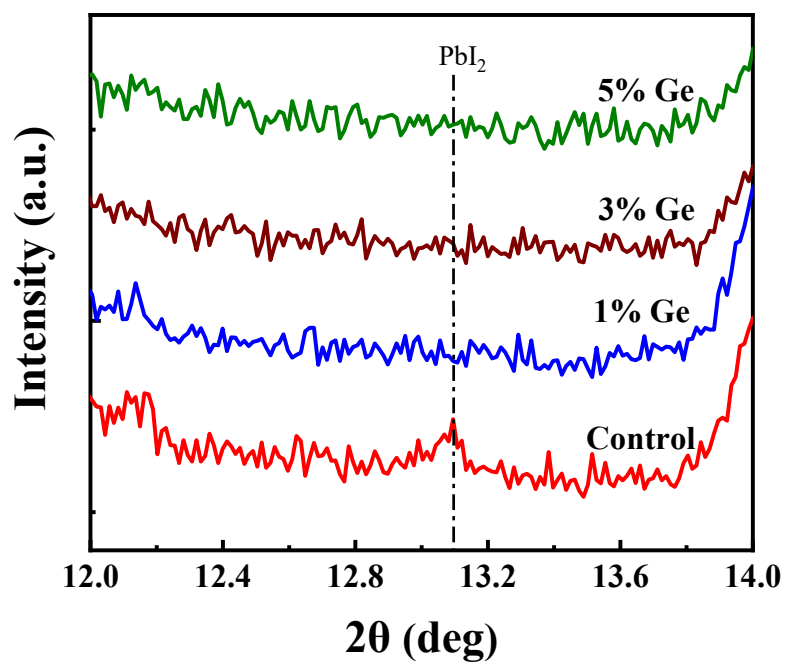

Figure S1. XRD phase analysis of samples with different Ge contents.

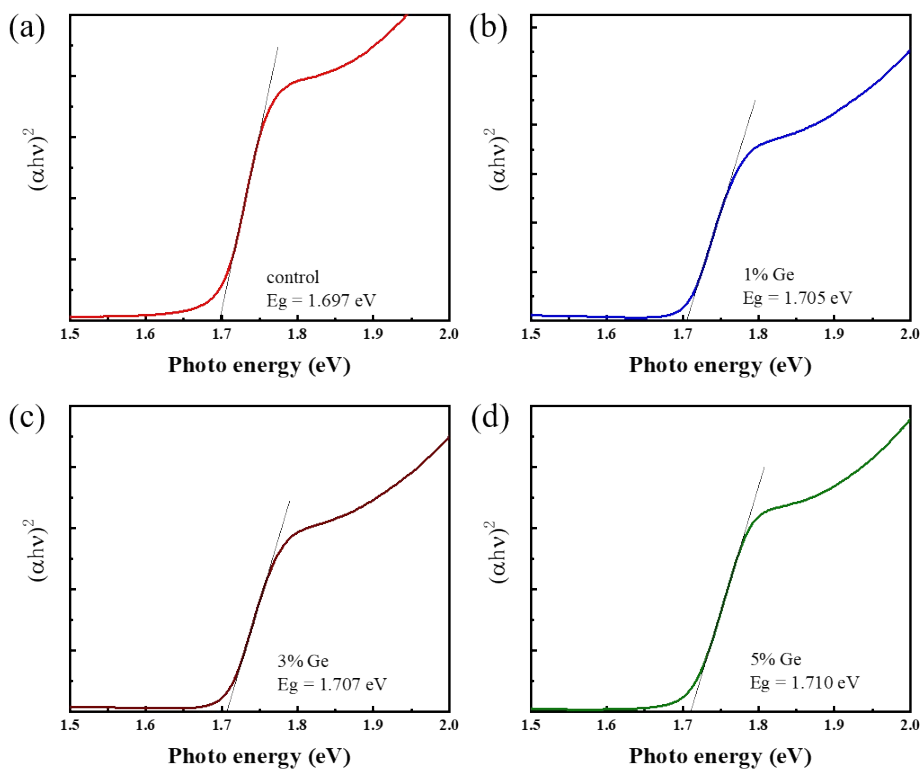

Figure S2.  $(\alpha h\nu)^2$  versus light excitation energy  $h\nu$ . (a) The Control, (b) 1% Ge doped perovskite film, (c) 3% Ge doped perovskite film, (d) 5% Ge doped perovskite film.

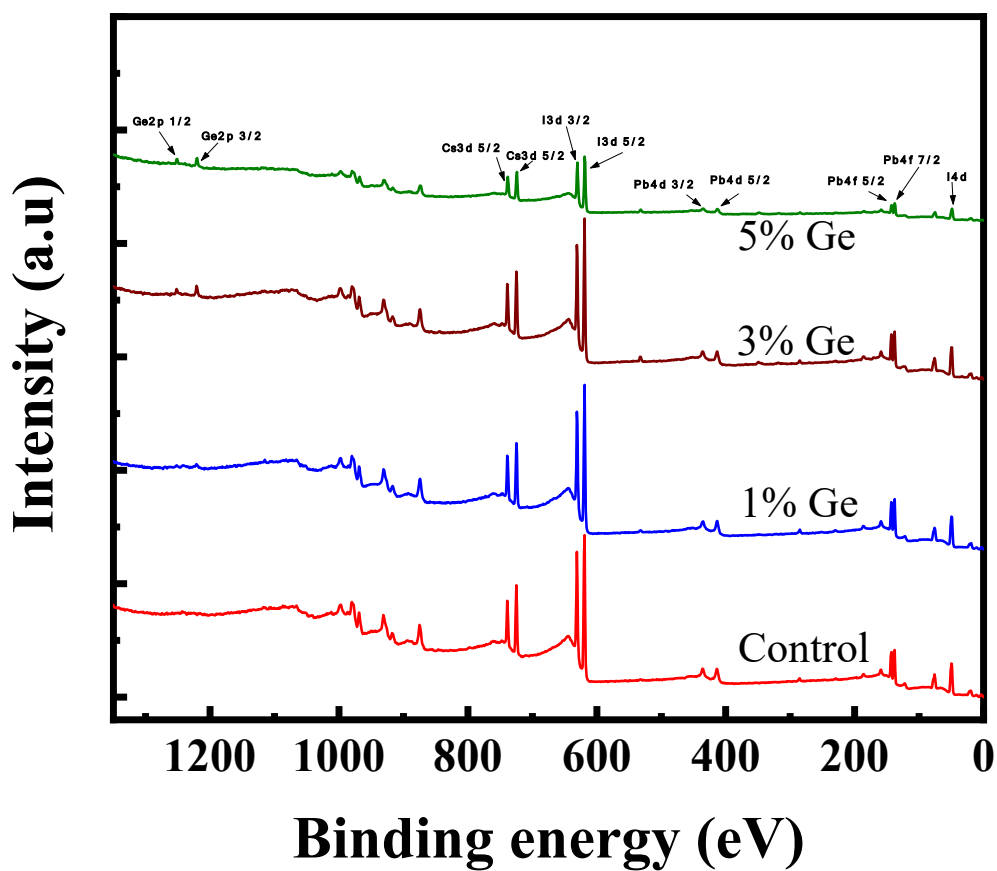

Figure S3. XPS profiles of the control and Ge-doped perovskite films.

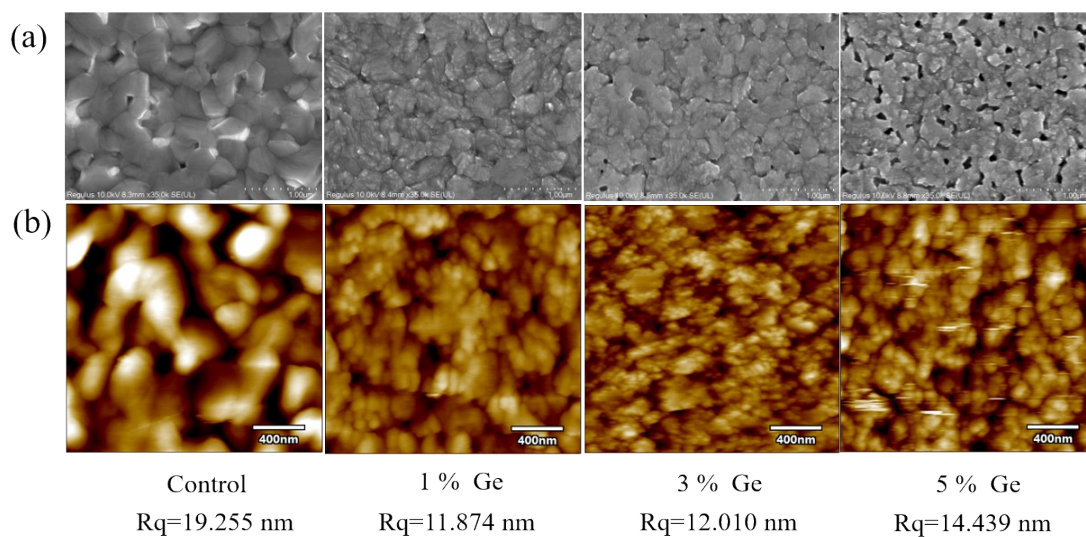

Figure S4. SEM (a) and AFM (b) image of perovskite films with and without Ge.

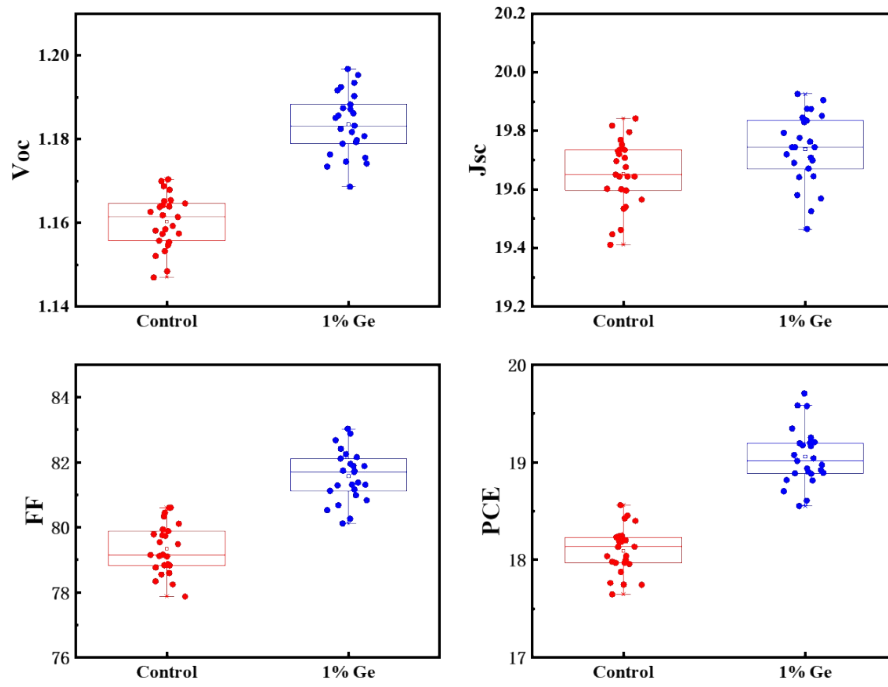

**Figure S5.** Statistical data of photovoltaic performance parameters of the Control and 1% Ge doped devices.

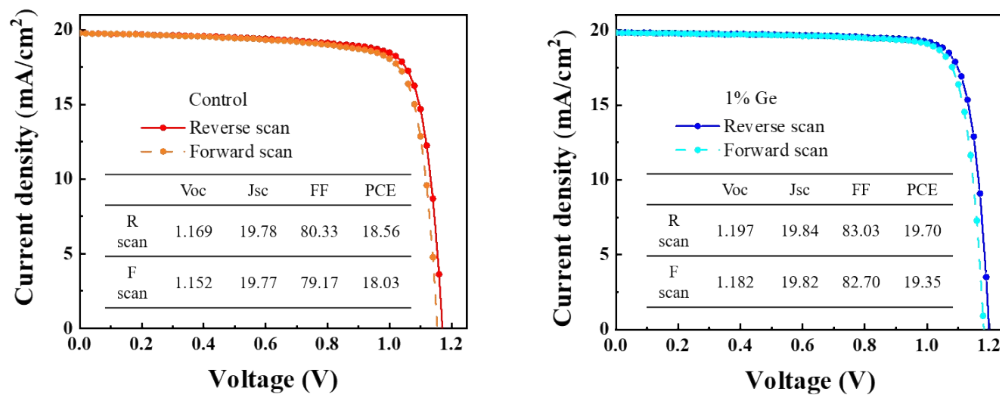

**Figure S6.** J-V curves of a) the Control and b) 1% Ge PSC under reverse and forward scans.

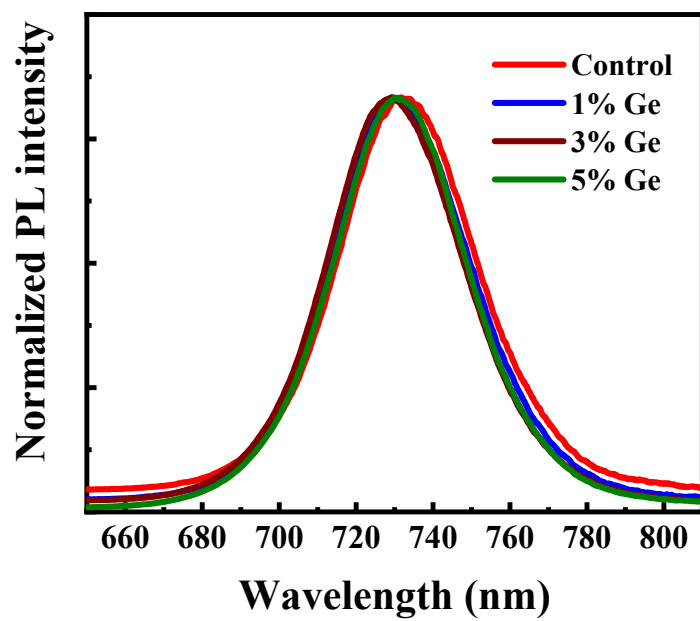

**Figure S7.** Steady-state PL spectra of the Control and Ge-doped perovskite films.

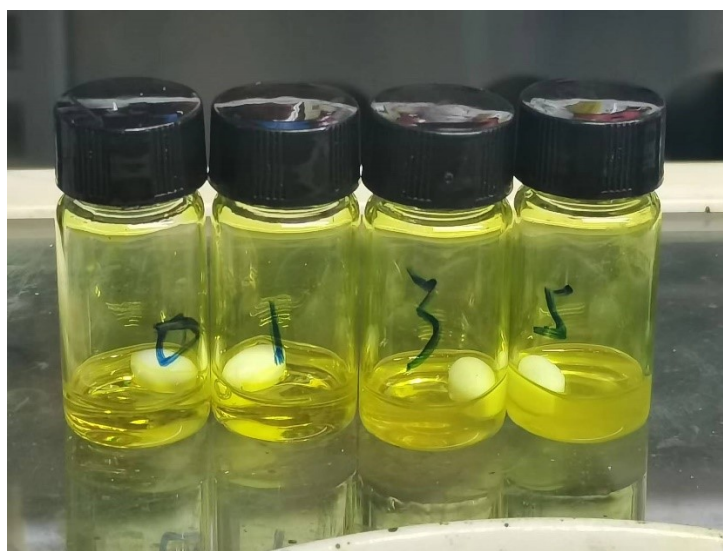

**Figure S8.** Photos of perovskite precursors with varying Ge element ratios.

**Table S1.** Calculation parameters of XRD

| Sample  | a=b=c/Å   | Refinable parameter U | Refinable parameter V | Refinable parameter W | FWHM (110) | FWHM (220) | Preferred G1 |
|---------|-----------|-----------------------|-----------------------|-----------------------|------------|------------|--------------|
| Control | 6.1919(5) | 0.4915                | -0.1505               | 0.0202                | 0.0091     | 0.0140     | 16.4366      |
| 1%Ge    | 6.1907(4) | 0.6258                | -0.2002               | 0.0251                | 0.0099     | 0.0151     | 17.1380      |
| 3%Ge    | 6.1816(5) | 0.2115                | -0.0100               | 0.0099                | 0.0120     | 0.0213     | 13.3433      |
| 5%Ge    | 6.1799(6) | 0.1852                | -0.0069               | 0.0101                | 0.0122     | 0.0207     | 9.9189       |

**Table S2.** The PCE data of 1% Ge devices

| Voc   | Jsc   | FF    | PCE   |
|-------|-------|-------|-------|
| 1.193 | 19.87 | 81.16 | 19.24 |
| 1.173 | 19.79 | 80.53 | 18.70 |
| 1.192 | 19.69 | 81.29 | 19.08 |
| 1.181 | 19.57 | 81.88 | 18.92 |
| 1.176 | 19.72 | 81.12 | 18.81 |
| 1.179 | 19.64 | 80.17 | 18.56 |
| 1.190 | 19.71 | 81.70 | 19.16 |
| 1.180 | 19.64 | 82.16 | 19.04 |
| 1.183 | 19.52 | 81.73 | 18.87 |
| 1.174 | 19.84 | 82.25 | 19.15 |
| 1.187 | 19.77 | 81.74 | 19.18 |
| 1.174 | 19.90 | 80.83 | 18.89 |
| 1.188 | 19.87 | 82.88 | 19.57 |
| 1.179 | 19.70 | 80.99 | 18.81 |
| 1.182 | 19.67 | 81.37 | 18.92 |
| 1.182 | 19.58 | 82.12 | 19.00 |
| 1.187 | 19.46 | 81.95 | 18.93 |
| 1.192 | 19.92 | 82.41 | 19.57 |
| 1.175 | 19.85 | 81.31 | 18.97 |
| 1.186 | 19.76 | 81.89 | 19.20 |
| 1.197 | 19.83 | 83.03 | 19.70 |
| 1.168 | 19.68 | 80.23 | 18.44 |
| 1.185 | 19.74 | 82.68 | 19.34 |
| 1.192 | 19.45 | 81.34 | 18.85 |
| 1.183 | 19.72 | 80.68 | 18.82 |

**Table S3.** The fitting parameters of the TRPL spectra

| Sample  | A <sub>1</sub> | τ <sub>1</sub> | A <sub>2</sub> | τ <sub>2</sub> | τ (ns) |
|---------|----------------|----------------|----------------|----------------|--------|
| Control | 0.64           | 1.6            | 0.37           | 4.26           | 3.21   |
| 1% Ge   | 0.19           | 1.95           | 0.56           | 7.09           | 6.65   |
